# Supplementary material
Source: Springer Nature journal article supplement (https://www.springermedizin.de/resource/supplementary/12911_2009_283_MOESM6_ESM.pdf/9527536)

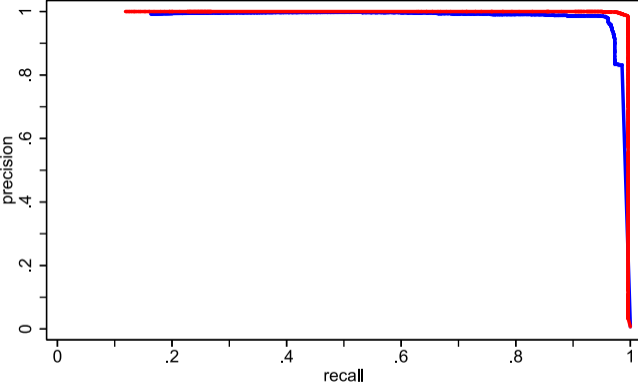

— phonetic encoding

— Bloom filter

Supplement: MOESM6 [file 9527536]
